# Supplementary material for: 1,1-Bis[(di-4-tolylamino)phenyl]cyclohexane for fast response organic photodetectors with high external efficiency and low leakage current
Source: Royal Society of Chemistry journal article supplement (doi:10.1039/c3tc00564j), 2013-01-01
Supplement: c3tc00564j.pdf [file c3tc00564j.pdf]

# Supporting Information

For

**1,1-bis[(di-4-tolylamino)phenyl]cyclohexane for Fast Response  
Organic Photodetectors with High External Efficiency and Low  
Leakage Current**

Dezhi Yang and Dongge Ma\*

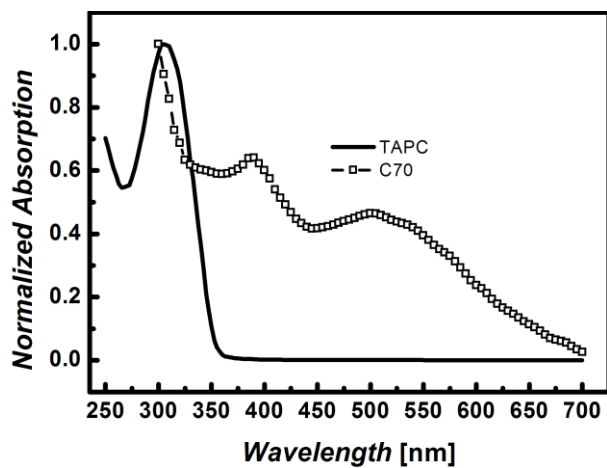

Figure S.1 Normalized absorption spectrum of TPAC and C70.

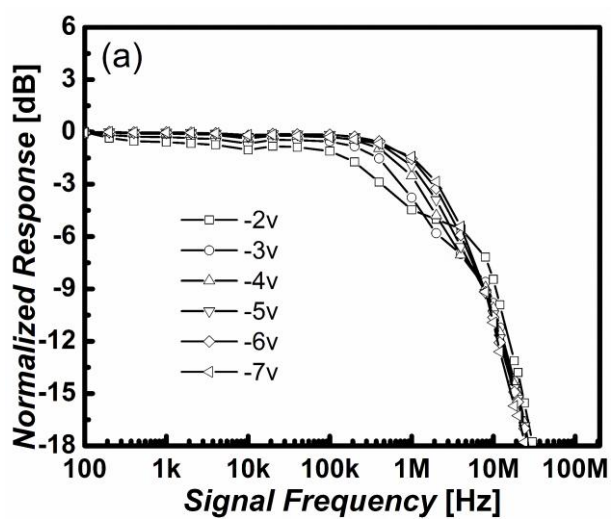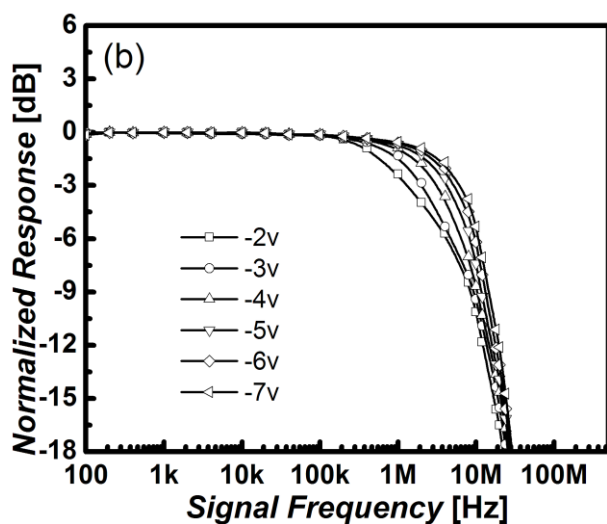

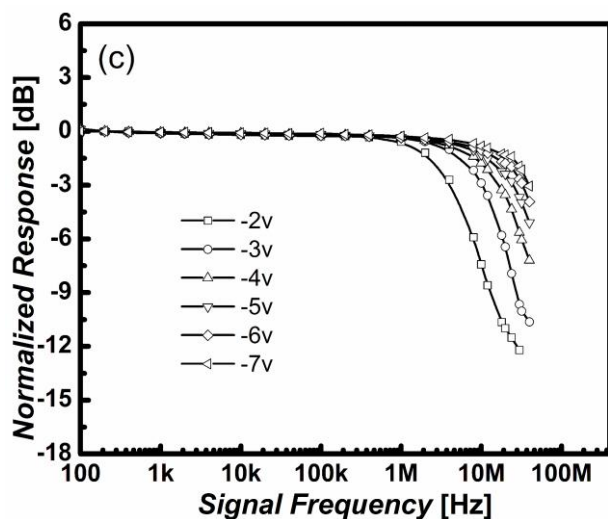

**Figure S.2** Frequency response characteristics under different bias conditions and excitation by a 405nm laser. The device structure is ITO/ TAPC (40 nm) / TAPC: C70 (50 nm) / C70 (20 nm) / Al. The TAPC concentrations in figure (a), (b) and (c) are 15%, 30% and 45%, respectively.

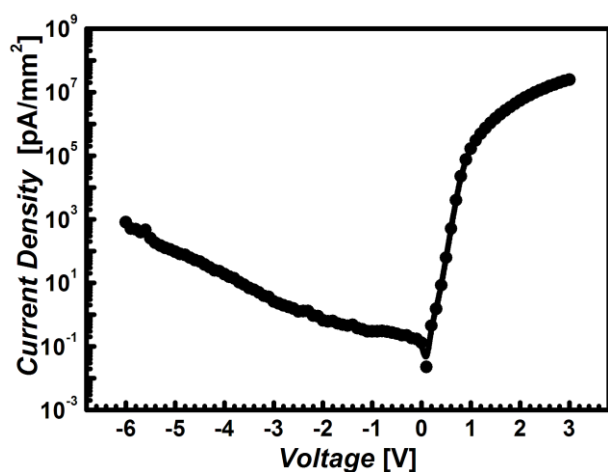

**Figure S.3** J–V characteristic of the photodetector with 30% TAPC concentration at dark.

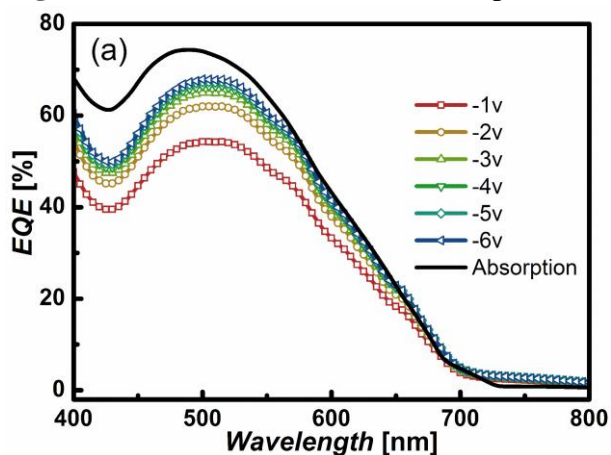

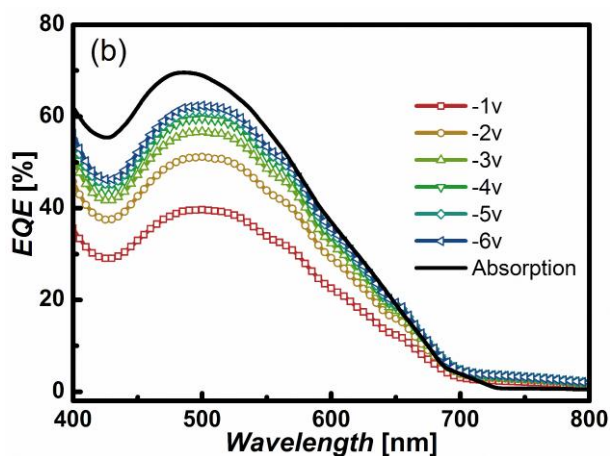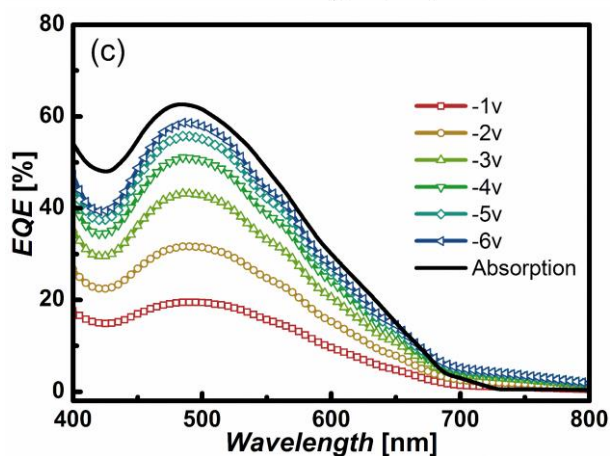

**Figure S.4** EQE values of the photodetector under different reverse voltages and the absorption efficiency of the mixing layer calculated by transfer matrix method. The device structure is ITO / TAPC (40 nm) / TAPC: C70 (50 nm) / C70 (20 nm) / Al. The TAPC concentrations in figure (a), (b) and (c) are 15%, 30% and 45%, respectively. The solid line shows the absorption efficiency.

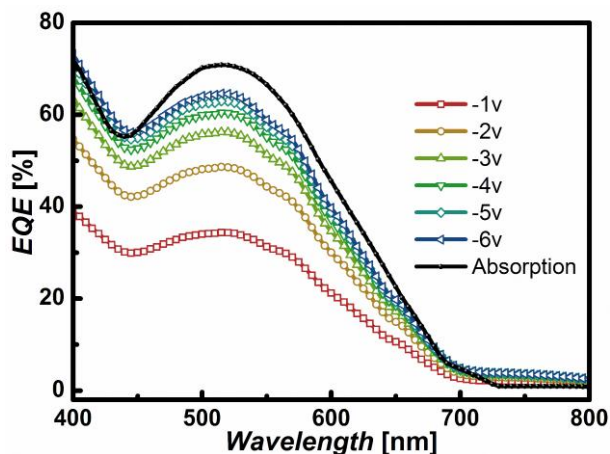

**Figure S.5** EQE values of the photodetector under different reverse voltages and the absorption efficiency of the mixing layer calculated by transfer matrix method. The device structure is ITO / TAPC (40 nm) / TAPC: C70 (75 nm) / C70 (20 nm) / Al and the TAPC concentration is 30%.
